# Supplementary material for: Synthesis of a multi-functional DNA nanosphere barcode system for direct cell detection
Source: Royal Society of Chemistry journal article supplement (doi:10.1039/c7nr03615a), 2017-01-01
Supplement: c7nr03615a1.pdf [file c7nr03615a1.pdf]

## Supplementary Information

# **Synthesis of Multi-functionalized DNA Nanosphere Barcode System for Direct Cell Detection**

*Sangwoo Han<sup>†</sup>, Jae Sung Lee<sup>†</sup> and Jong Bum Lee<sup>\*†</sup>*

<sup>†</sup> Department of Chemical Engineering, University of Seoul, 163 Seoulsiripdaero,  
Dongdaemungu, Seoul, 02504, Republic of Korea

E-mail: [jblee@uos.ac.kr](mailto:jblee@uos.ac.kr)

## **Supplementary method**

### **Size control of self-assembled DNANS**

To adjust the size of DNANSs, each different dNTP concentration was reacted (2.0mM and 0.8mM). Other reactants were used as same concentration for RCA explained in material and method.

### **Optimization of the ratio between qdot-streptavidin and biotin**

To investigate the optimized ration between quantum dots and DNANSs, 1:25, 1:50 and 1:250 molar ratio of qdot-STA and biotin-14-dCTP in DNANSs were mixed and incubated overnight at room temperature. After overnight incubation, the qdots-conjugated DNANSs were washed as the same method mentioned in materials and methods. Each samples were observed by using an Eclipse Ti (Nikon) inverted fluorescent microscope.

### **Detection limit test**

To confirm the detection sensitivity of anti-EGFR Ab-DNANSs, twenty-four hours before the sensitivity test, the Hela cells were trypsinized and prepared with the different density of Hela cells (0, 1, 5, 20, 100 cells  $\mu\text{l}^{-1}$ ). Each prepared Hela cells were arranged on 96-well plate (100  $\mu\text{l}$  per well). One hour before the treatment of anti-EGFR Ab-DNANSs on Hela cells, the medium was exchanged with fresh serum-free DMEM. Cy5-labeled anti-EGFR Ab-DNANSs were treated at a 50 nM concentration to arranged Hela cells and the cells were incubated at 37 °C with 5%  $\text{CO}_2$  for 2 hours. After 2 hours, the anti-EGFR Ab-DNANSs were washed with DPBS and filled with serum-free DMEM. To measure the fluorescence intensity from the anti-EGFR Ab-DNANSs attached to Hela cells, microplate reader (Synergy HT, BioTek) was used and the results were analyzed using Gene5 2.01 software (BioTek).

### **Optical single cells detection test**

Twenty-four hours before the HeLa cells detection test, the cells were trypsinized, diluted with fresh medium ( $1.5 \times 10^5$  cells  $\text{ml}^{-1}$ ), and transferred to 8-well plates (200  $\mu\text{l}$  per well) and 24-well plates (500  $\mu\text{l}$  per well). One hour before the treatment of anti-EGFR Ab-DNANSs on HeLa cells, the medium was exchanged with fresh serum-free medium. To image and measure the fluorescence intensity of anti-EGFR Ab-DNANS bound to the cell surface, cy5-labeled anti-EGFR Ab-DNANS was treated at a 50 nM concentration to 8-well plates and 24-well plates, and the cells were incubated at 37 °C with 5%  $\text{CO}_2$  for 2 hours with gentle agitation. After 2 hours, the anti-EGFR Ab-DNANSs were washed 2 times with DPBS. For imaging, the cells in the 8-well plates were fixed with 4% formaldehyde buffer (MBiotech) and washed with DPBS. The cells were stained with DAPI at a final concentration of 5  $\mu\text{g ml}^{-1}$  to locate the cell nucleus. An Eclipse Ti (Nikon) inverted fluorescent microscope was used to image the cells. To measure the difference in fluorescence intensity of the cells treated with anti-EGFR Ab-DNANS and control group, all the cells were trypsinized from 24-well plates and centrifuged at 2000 r.p.m for 3 min. The medium of each cell was removed and filled with fresh serum-free medium. The cells were stained with Hoechst 33342, and analyzed using a Nucleocounter (NC-3000, Chemometec) and the results were analyzed using NucleoViews NC-300 software (Chemometec) and Flowjo.

### **Toxicity assay of anti-EGFR Ab-DNANS**

Twenty-four hours before the toxicity assay, the HeLa cells were trypsinized and prepared with the different density of HeLa cells 40 cells  $\mu\text{l}^{-1}$ . HeLa cells were arranged on 96-well plate (100  $\mu\text{l}$  per well). One hour before the treatment of anti-EGFR Ab-DNANSs on HeLa cells, the

medium was exchanged with fresh serum-free DMEM. qdots-labeled anti-EGFR Ab-DNANSs were treated at a 50 nM concentration to arranged HeLa cells and the cells were incubated at 37 °C with 5%  $\text{CO}_2$  for 2 hours. After 2 hours, the anti-EGFR Ab-DNANSs were washed with DPBS and filled with Cell Counting Kit-8 (CCK-8) (Dojindo, Japan) and incubated for 90 min. The absorbance of the solution was measured at 450 nm on a Synergy HT microplate reader (BioTek), and the results were analysed using Gen5 2.01 software (BioTek).

**Table 1.** DNA sequences used in DNANS assembly.

| Name              | Sequence (5' to 3')                                                                                                                    | Modification |
|-------------------|----------------------------------------------------------------------------------------------------------------------------------------|--------------|
| Linear DNA (92bp) | ACG TAC GGG TGA CGA AAC GAC<br>GTT CCA TCG CTG TTA GAC TCA<br>GAT TGG TTG CAC TTT CAG CAC<br>GGG TTA TTC CGA GTG AAC CGT<br>CCA CCA TC | 5'-Phosphate |
| Primer (20bp)     | CCC GTA CGT GAT GGT GGA CG                                                                                                             |              |

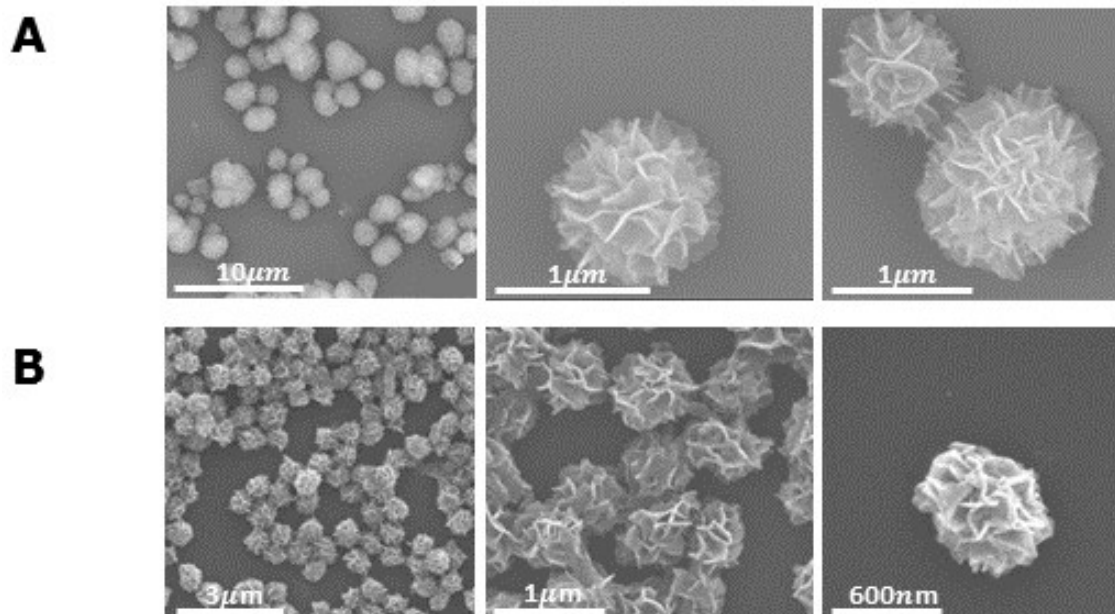

**Fig. S1.** FE-SEM images of A) 2.0mM dNTP containing DNANS and B) 0.8mM dNTP containing DNANS.

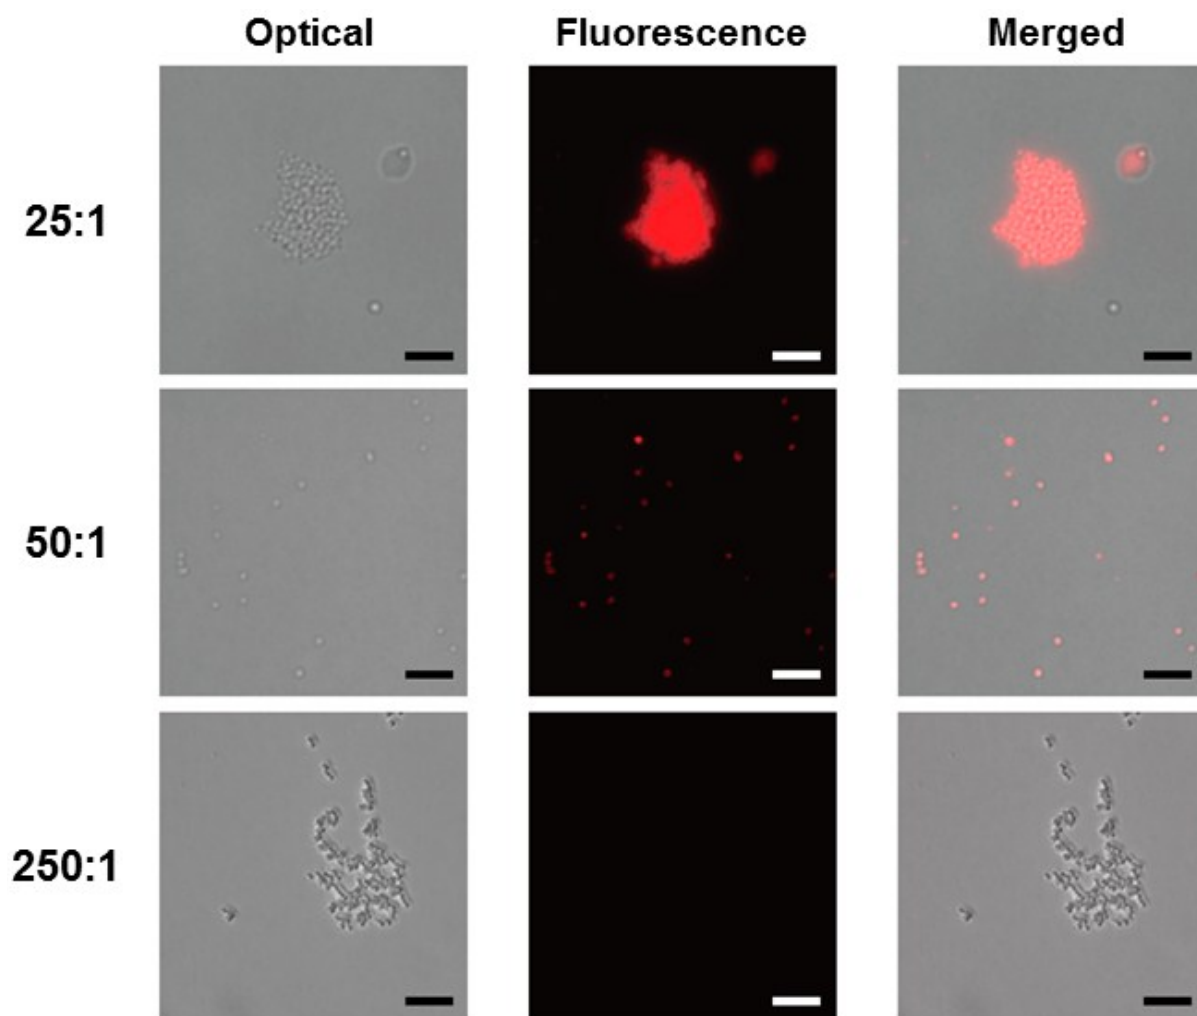

**Fig. S2.** Biotin : quantum dot ratio-dependent optical, fluorescence and merged microscope images of quantum dots-conjugated DNANSs. Scale bar:  $10\mu m$ .

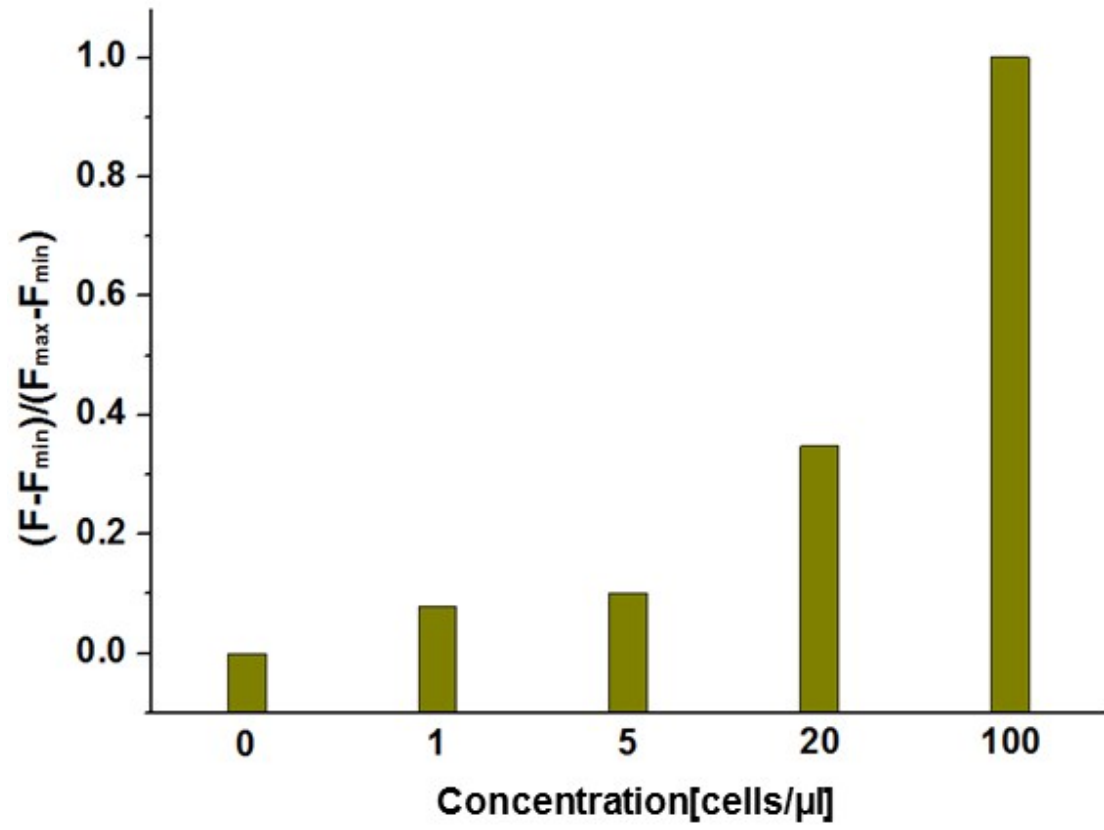

**Fig. S3.** Detection limit of anti-EGFR Ab-DNANS.



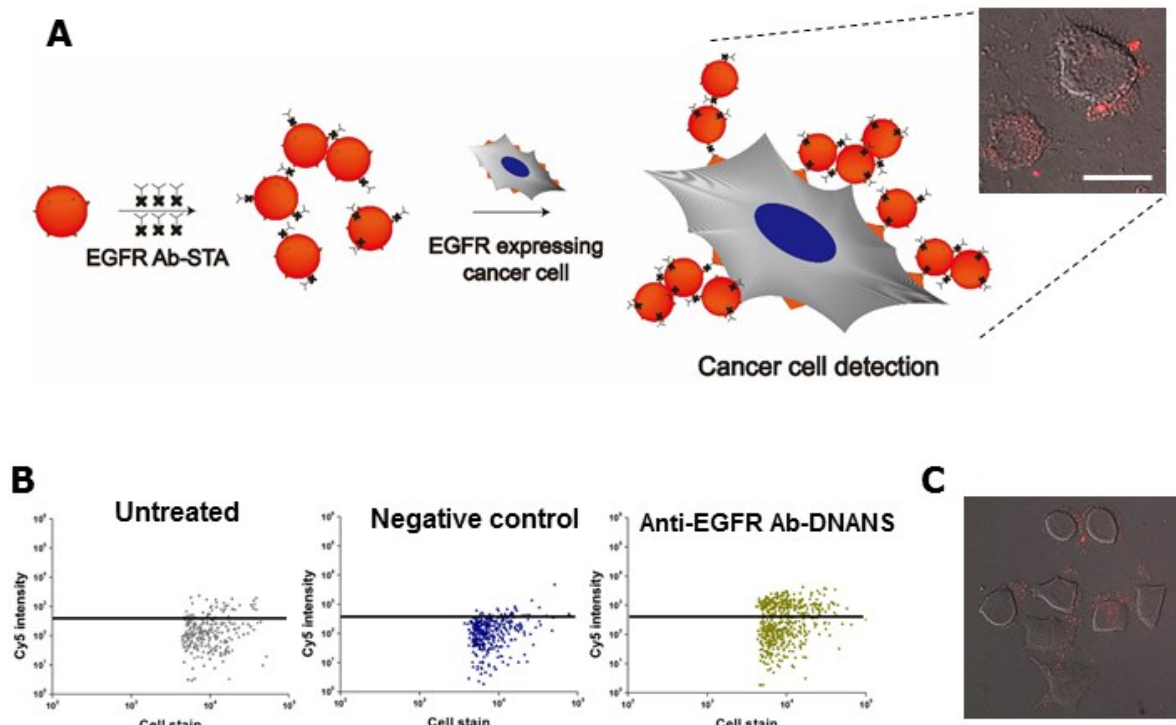

**Fig. S4.** A) Schematic illustration of the fabrication of anti-EGFR Ab-DNANSs and binding process on the surfaces of cancer cells and B) Image cytometry data after cell surface binding. C) Microscopy images of HeLa cells-bound with anti-EGFR Ab-DNANSs. Scale bar:  $20\mu m$ .

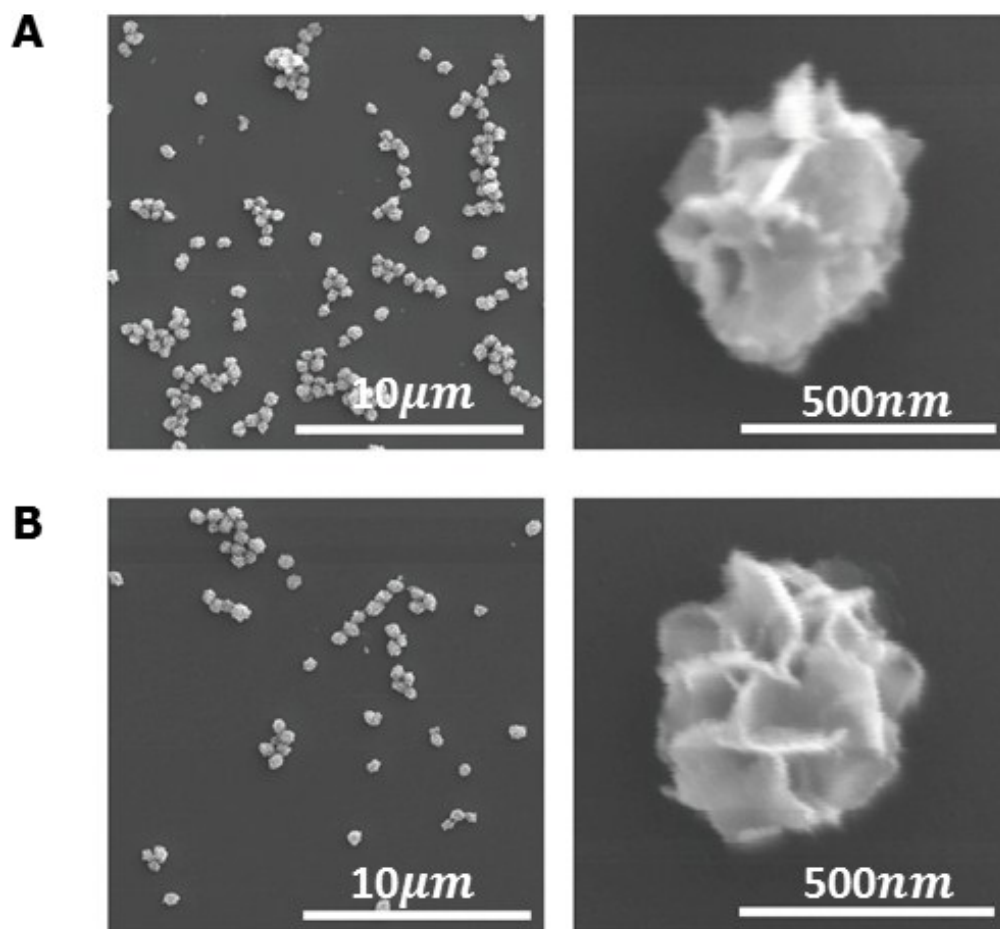

**Fig. S5.** Structural stability of DNANSs by FE-SEM after storing for 150 days in water. A) DNANS stored for 150 days. B) Newly fabricated DNANS.

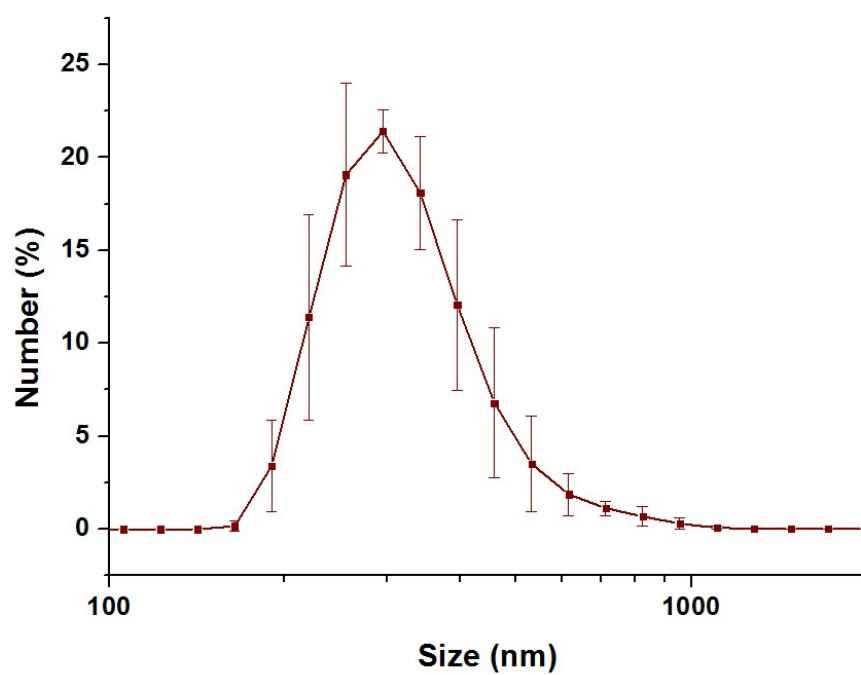

**Fig. S6.** Size distribution of DNANSs stored in water solution for 6 months.

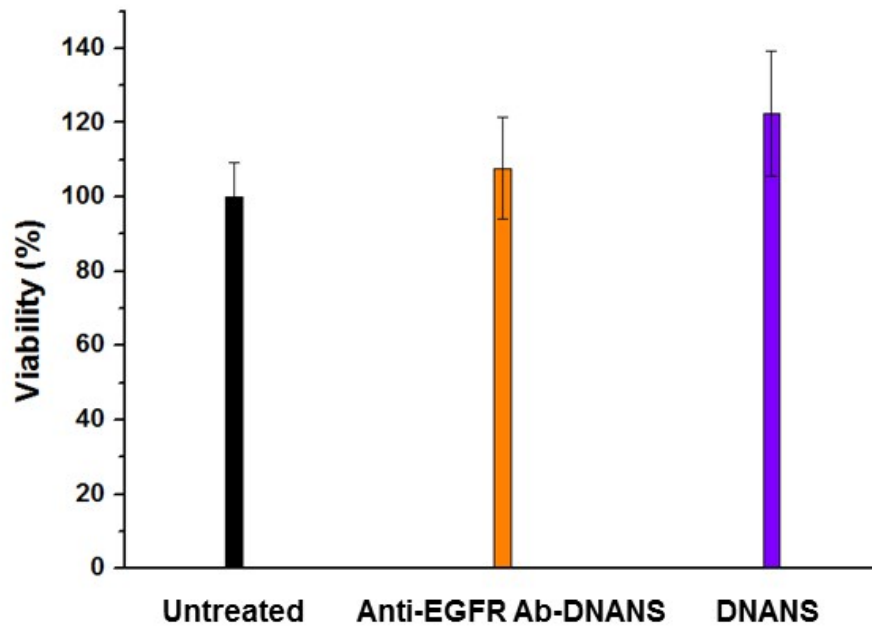

**Fig. S7.** Toxicity assay of anti-EGFR Ab-DNANS.

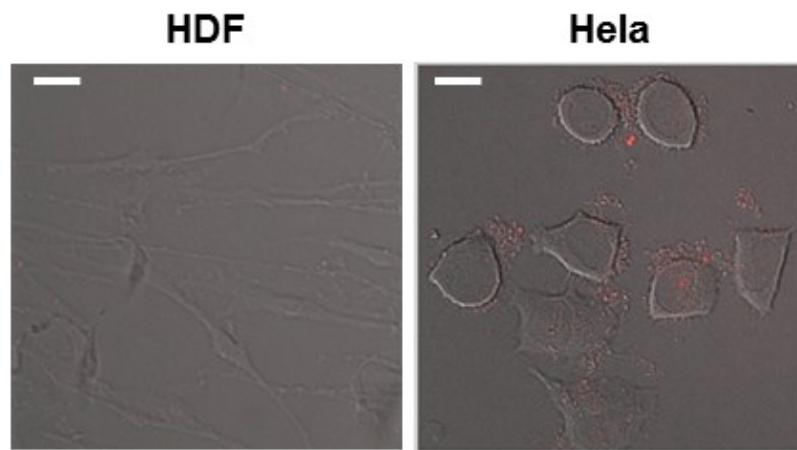

**Fig. S8.** Binding capability assays of anti-EGFR Ab-DNANS on human dermal fibroblast (HDF) cells as a control group (left) and HeLa cells (right). Scale bar:  $10\mu m$ .

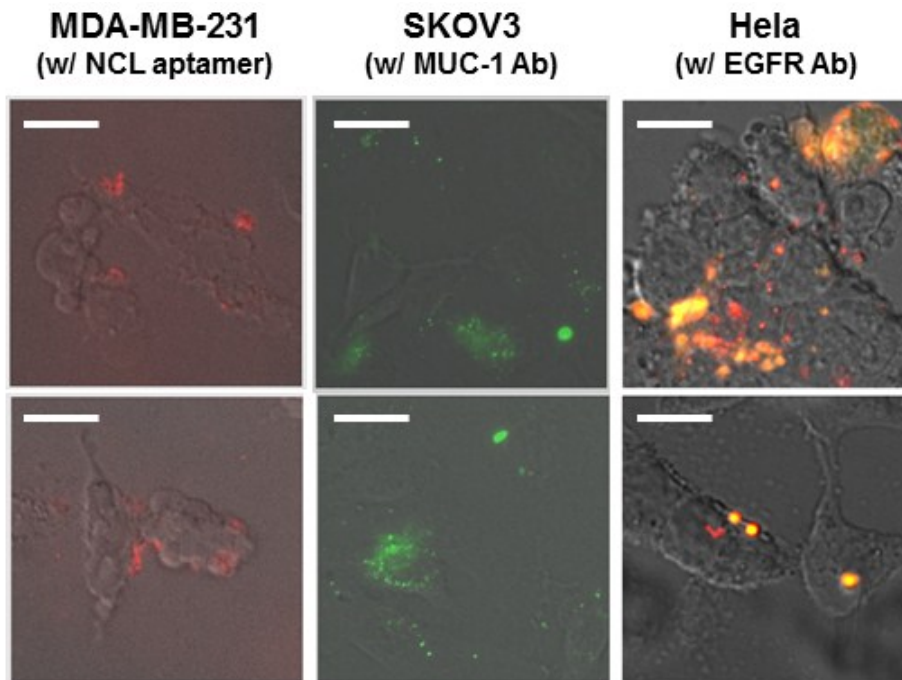

**Fig. S9.** Three kinds of cancer cells targeted by each different target methods with NCL aptamer for MDA-MB-231 (left), MUC-1 antibody for SKOV3 (middle) and EGFR antibody for HeLa (right) cells detection. Scale bar:  $20\mu m$ .
